# Supplementary material for: A green chemistry approach for synthesizing thermostable antimicrobial peptide-coated gold nanoparticles immobilized in an alginate biohydrogel
Source: Royal Society of Chemistry journal article supplement (doi:10.1039/c6ra14688k), 2016-01-01
Supplement: c6ra14688k1.pdf [file c6ra14688k1.pdf]

## **A green chemistry approach for synthesizing thermostable antimicrobial peptide-coated gold nanoparticles immobilized in alginate biohydrogel**

Sachin V. Otari<sup>a</sup>, Sanjay K.S. Patel<sup>a</sup>, Jae-Hoon Jeong<sup>a</sup>, Jai Hyo Lee<sup>b</sup>, and Jung-Kul Lee<sup>a,\*</sup>

<sup>a</sup>Department of Chemical Engineering, Konkuk University, Seoul 05029, Republic of Korea

<sup>b</sup>Department of Mechanical Engineering, Konkuk University, Seoul 05029, Republic of Korea

\*Correspondence.

Phone: +82-2-450-3505, Fax: +82-2-458-3504, E-mail: jkrhee@konkuk.ac.kr

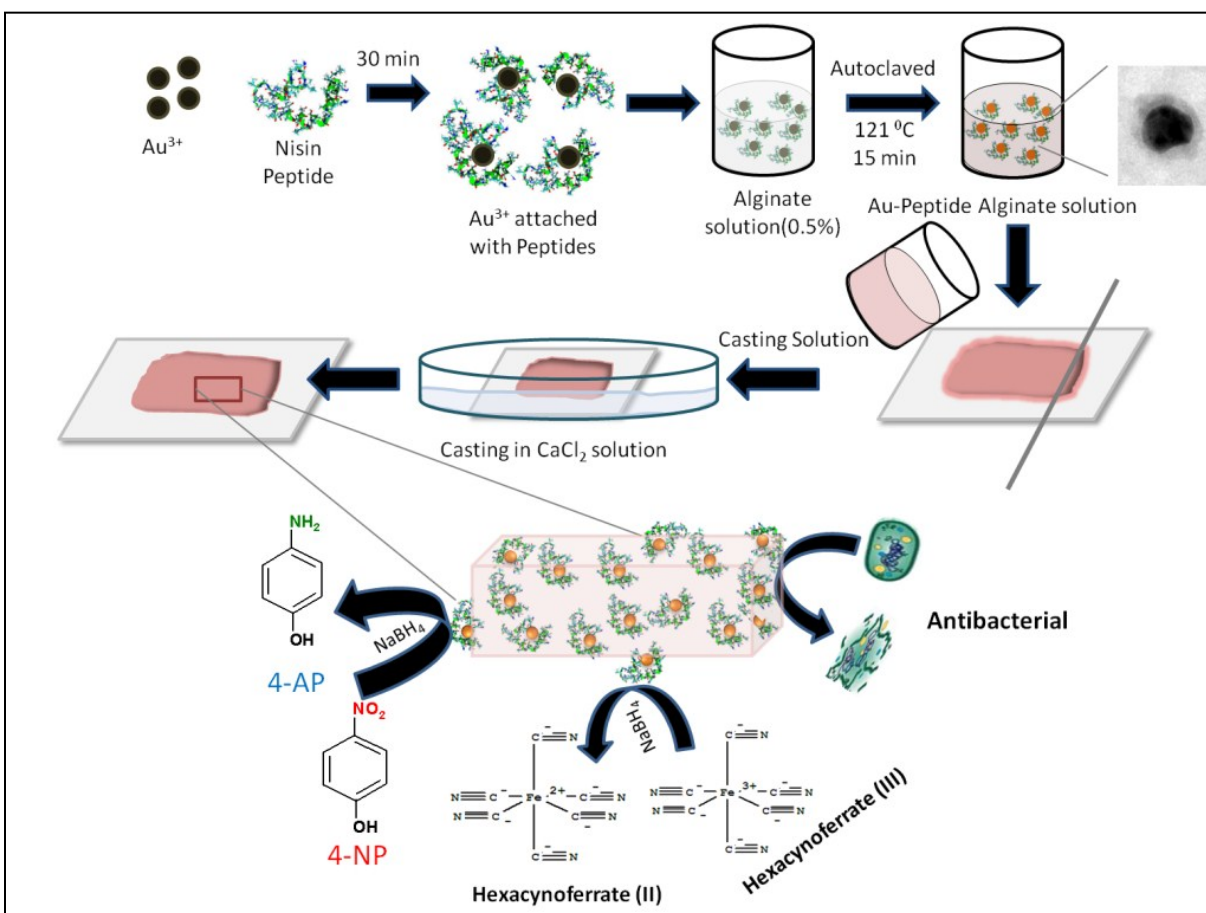

**Fig. S1:** Schematic representation of the fabrication procedure of Aupeptide-alginate biohydrogel based thermostable nisin peptide and its applications

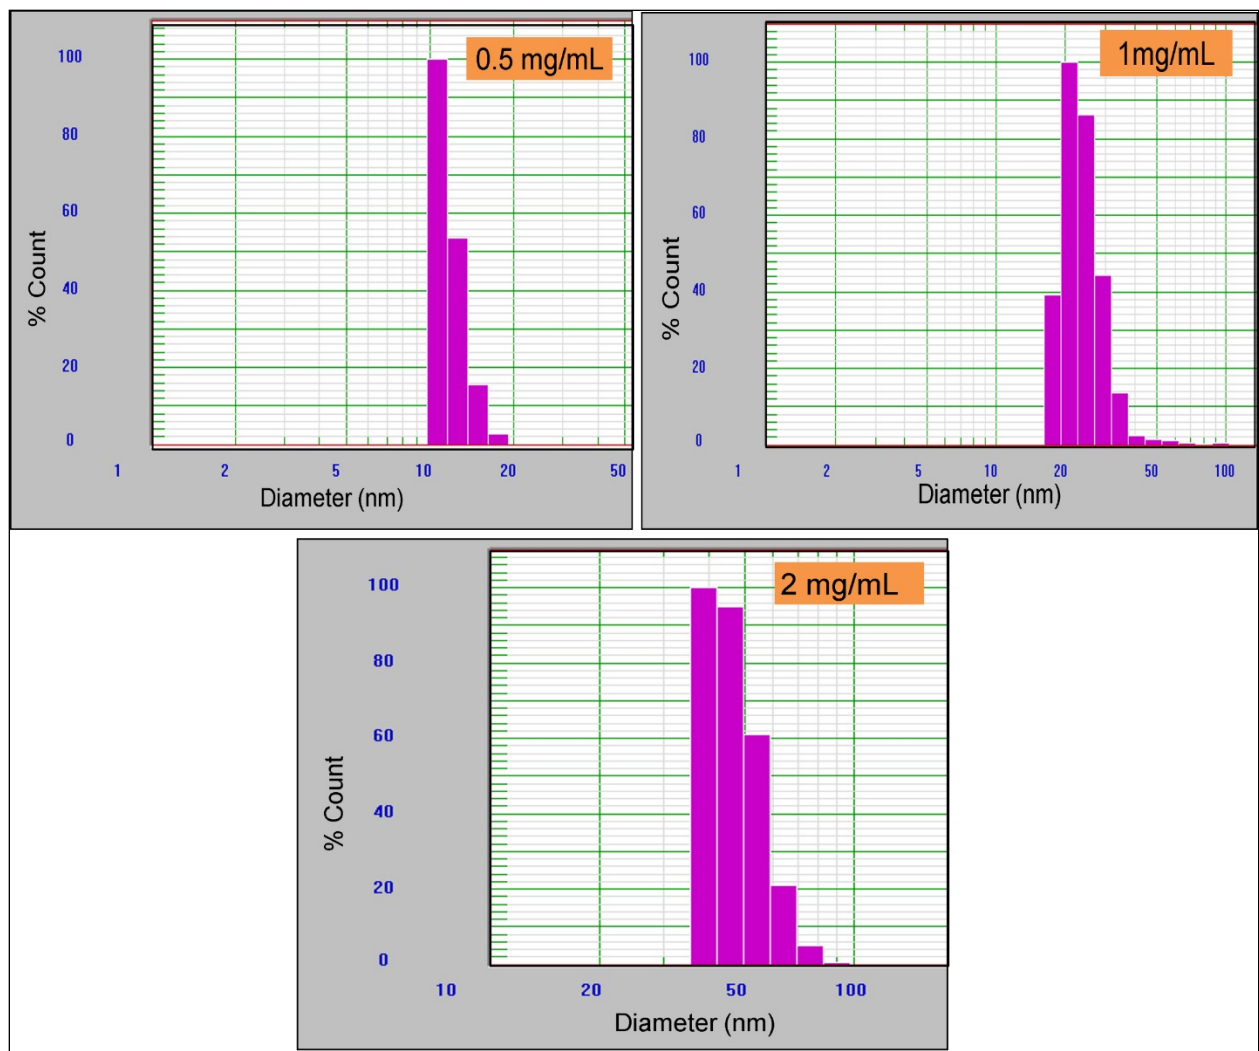

**Fig. S2:** Hydrodynamic diameter of the AuNPs formed using nisin peptides at 0.5, 1, and 2 mg/mL concentration

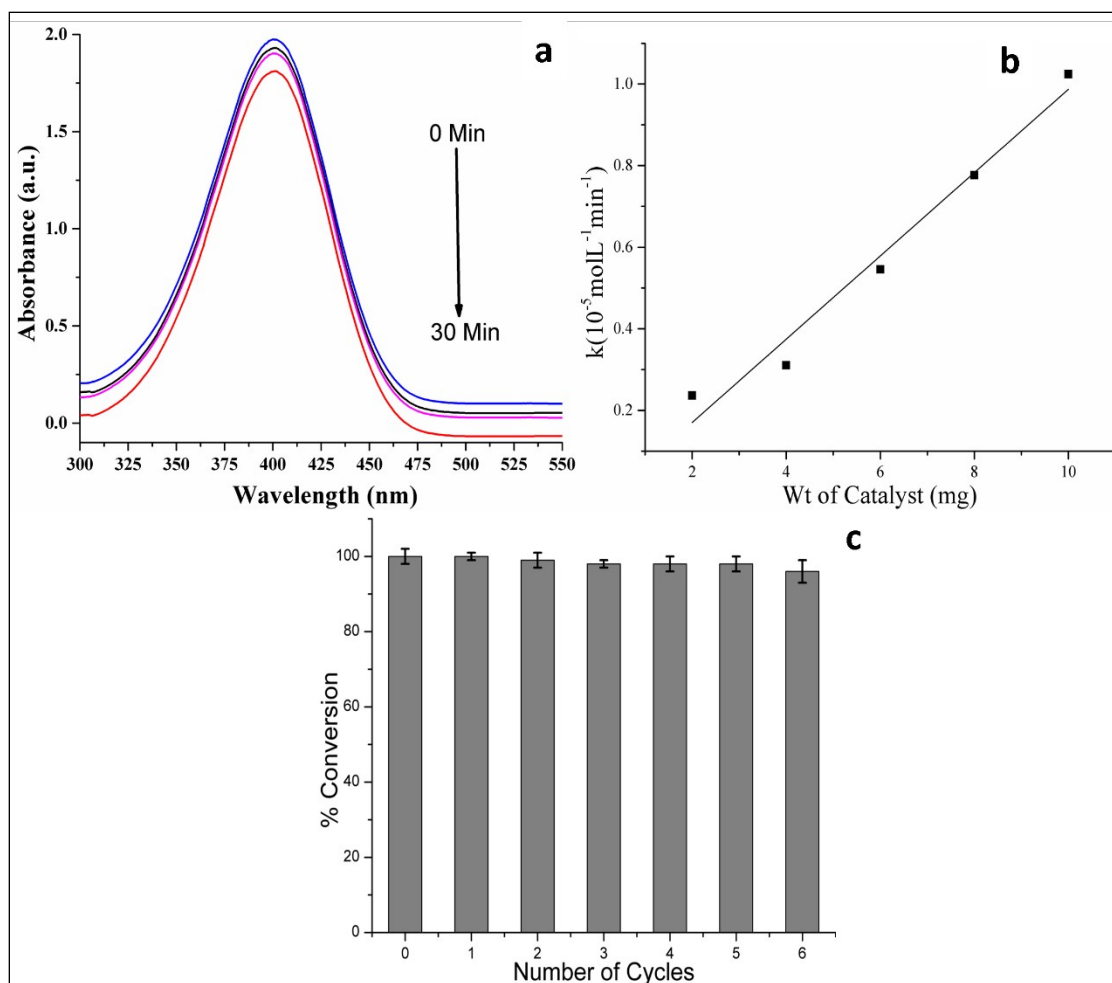

**Fig. S3:** (a) A time dependent series of UV-Vis absorption spectra taken during the reduction of 4-NP, (b) Plot of the rate constant ( $k$ ) versus catalyst dose for reduction of 4-NP in the presence of different concentration of Aupeptide-alginate biohydrogel by  $\text{NaBH}_4$ , and (c) Percent conversion of 4-NP for consecutive 7 cycles

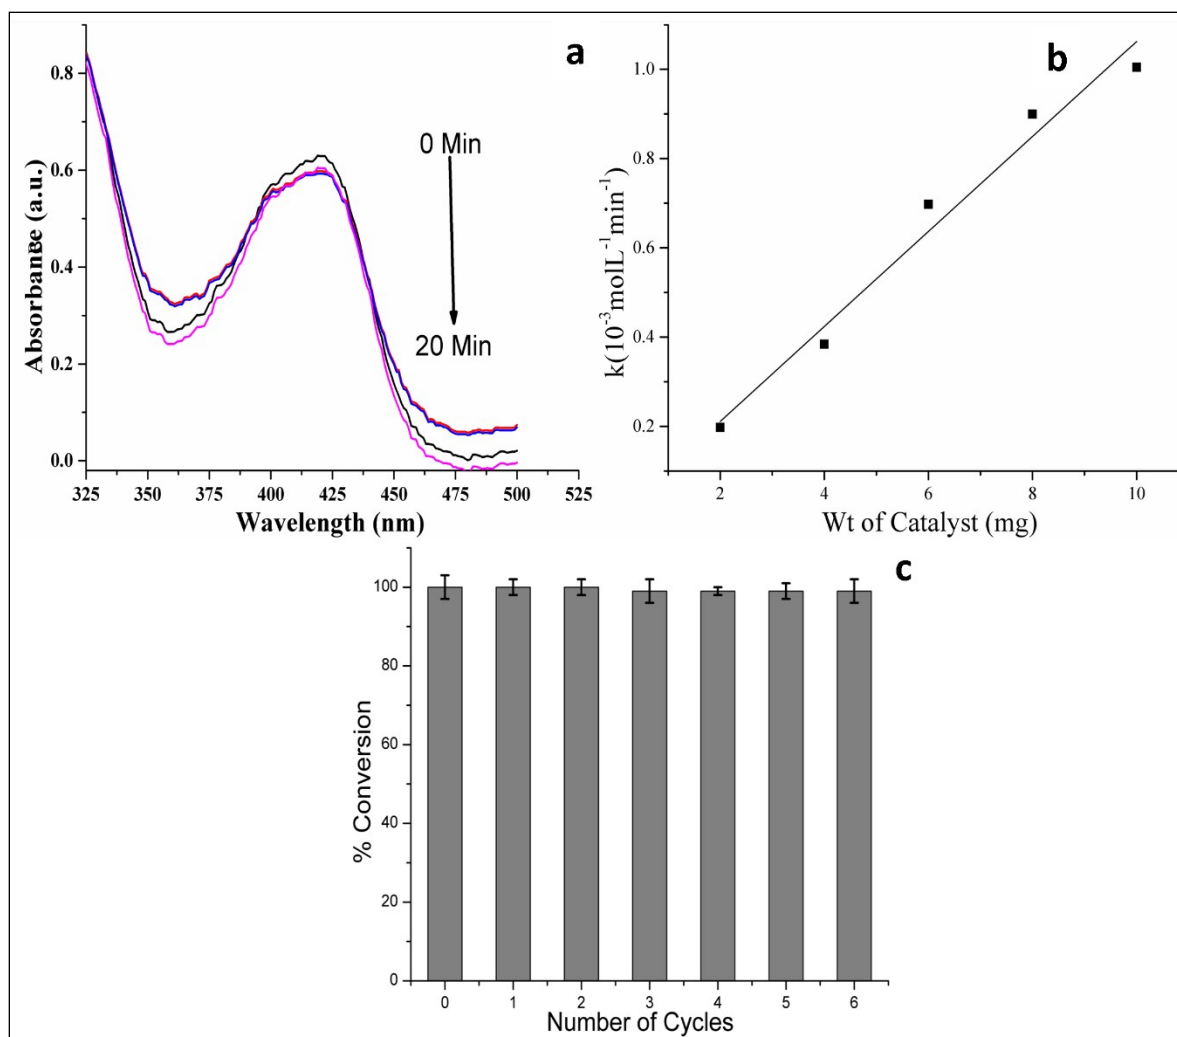

**Fig. S4:**(a) A time dependent series of UV-Vis absorption spectra taken during the reduction of Hexaferricynaide, (b) Plot of the rate constant ( $k$ ) versus catalyst dose for reduction of Hexaferricynaide in the presence of different concentration of Aupeptide-alginate biohydrogel by  $\text{NaBH}_4$ , and (c) Percent conversion of Hexaferricynaide for consecutive 7 cycles
